# Supplementary material for: A highly sensitive SERS probe for bisphenol A detection based on functionalized Au@Ag nanoparticles
Source: Royal Society of Chemistry journal article supplement (doi:10.1039/c8ay01966e), 2018-01-01
Supplement: c8ay01966e1.pdf [file c8ay01966e1.pdf]

## **Supporting Information**

### **A Highly Sensitive SERS Probe for Bisphenol A Detection Based on Functionalized Au@Ag Nanoparticles**

Chun-Yang Wang, Yi Zeng, Ai-Guo Shen,\* Ji-Ming Hu

Key Laboratory of Analytical Chemistry for Biology and Medicine (Ministry of Education), College of Chemistry and Molecular Sciences, Wuhan University, Wuhan 430072, P. R. China

\*Corresponding Authors Fax: +86 27 68754067.

E-mail: agshen@whu.edu.cn.

#### List of contents

1. **Fig. S1.** UV/Vis absorption spectra for the Au NPs and Au@Ag NPs.
2. **Fig. S2.** TEM image of Au@Ag NPs.
3. **Fig. S3.** Characterization of the average diameter of Au@Ag@CS NPs by dynamic light scattering distributions.
4. **Fig. S4.** Zeta potential of the surface of NPs: (A) Au@Ag NPs, (B) Au@Ag@CS NPs.
5. **Fig. S5.** Colour change of Au@Ag@MAB@CS NPs colloids system for various concentrations of anti-BPA aptamers. Concentration ranged from 1000 nM to 1 nM.

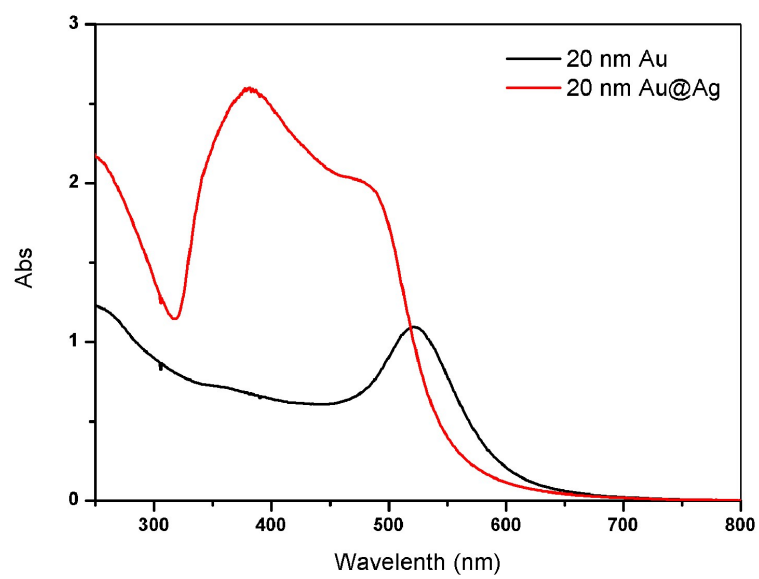

**Fig. S1.** UV/Vis absorption spectra for the Au NPs and Au@Ag core-shell NPs.

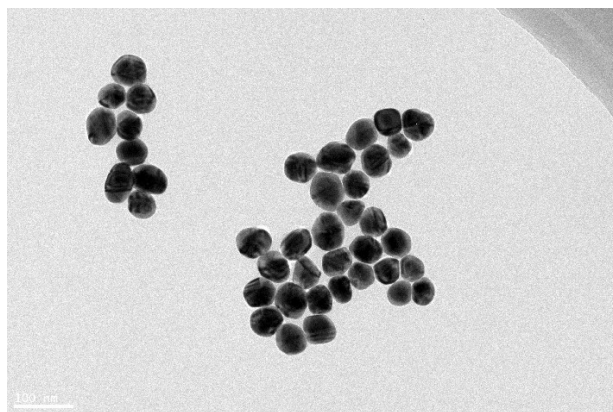

**Fig. S2.** TEM image of Au@Ag Nanoparticles.

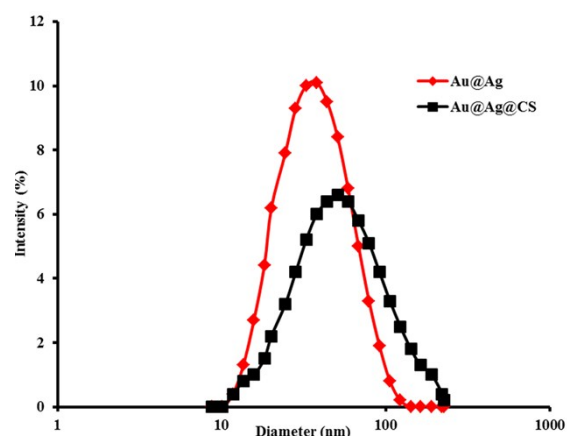

**Fig. S3.** Characterization of the average diameter of Au@Ag@CS NPs by dynamic light scattering distributions.

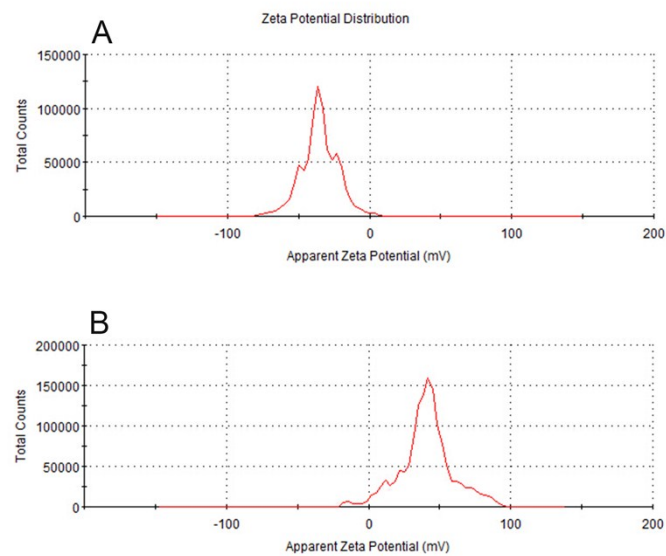

**Fig. S4.** Zeta potential of the surface of NPs: (A) Au@Ag NPs, (B) Au@Ag@CS NPs.

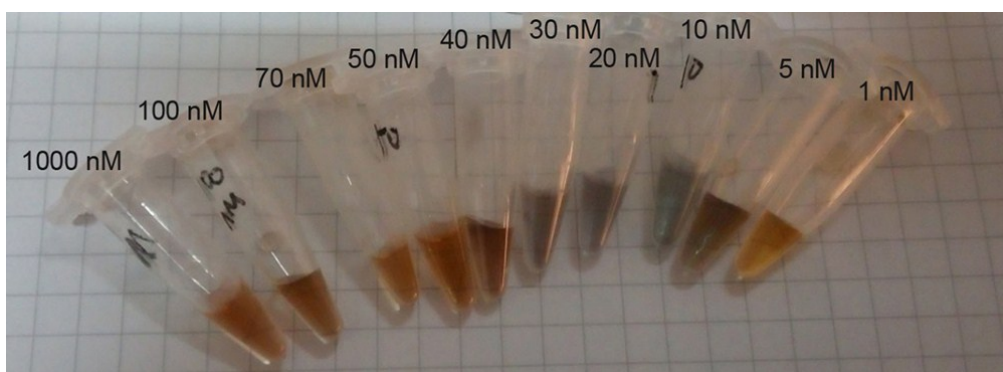

**Fig. S5.** Colour change of Au@Ag@MAB@CS NPs colloids system for various concentrations of anti-BPA aptamer DNA. Concentration ranged from 1000 nM to 1 nM.
